# Supplementary material for: Postoperative hyperlactatemia and serum lactate level trends among heart transplant recipients
Source: PeerJ. 2020 Feb 6;8:e8334. doi: 10.7717/peerj.8334 (PMC7007971; doi:10.7717/peerj.8334)
Supplement: Supplemental Information 1 [file peerj-08-8334-s001.xlsx]

## Sheet: Arkusz1
ID	M0	M6	M12	M18	M24	M30	M36	M42	M48	NORMALIZATION	REHYPERLACTATEMIA	RENORMALIZATION	EXIT AS N 0/ H 1	MIN
1	3.2	3.2	5.2	2.6	2.7	2.1	2	1	1.1	1	0		0	1
2	1.1	2.9	3.6	2.6	1.4	1.6	1.2	1.2	2.3	1	1	0	1	1.1
3	4	9	9.5	6.8	2.5	2.4	1.2	2	1.6	1	1	1	0	1.2
4	5	9.1	7.2	6.7	5.1	3	2.4	2.9	2.4	0			1	2.4
5	2.9	3.4	4.7	2.2	2.8	3.5	2.1	1.4	2	1	1	0	1	1.4
6	6.4	8.9	8	3.3	2.1	2	1.6	1.8	2.5	1	1	0	1	1.6
7	6.7	6.7	6.8	6.7	4.6	2.9	1.3	1.2	1.3	1	0		0	1.2
8	2.7	3.9	4	1.9	3.5	2.1	1.7	1.5	2.7	1	1	0	1	1.5
9	8.2	8.2	6.9	7.1	5.6	2.7	2.7	3	1.9	0			1	1.9
10	4.7	6.1	6.7	5.6	2.5	1.5	0.9	1.1	1.2	1	0		0	0.9
11	9.2	11.2	9.5	6.6	4.6	3.1	2.7	2.4	2.3	0			1	2.3
12	2.1	2.1	1.2	1.2	1.2	1.3	1.7	1.6	0.9	1	1	1	0	0.9
13	5.8	9.1	6.9	6	2.3	2.1	2.1	1.8	1.7	0			1	1.7
14	3.9	5.5	5	2.1	1.6	2.1	1.2	1.2	1	1	1	1	0	1
15	3	4	3.9	2.7	1.9	2.3	2.4	1.3	1.8	1	1	0	1	1.3
16	5.6	5.6	1.7	5.5	3	1.2	1.1	1.5	1	1	0		0	1
17	1.5	1.8	2	2.9	3.9	3.6	3.4	2.5	2.1	0			1	1.5
18	0.8	0.8	1	2.1	1	2.8	1.5	1.4	1.6	1	0		0	0.8
19	10.5	11.2	9.9	8.6	7	4.5	2.9	2.5	2.8	0			1	2.5
20	4.3	7.5	8.4	6.1	3.3	2.3	1.6	1.6	1.1	1	0		0	1.1
21	1.7	5	4.1	5.6	3.8	3.6	3.1	3	2.2	0			1	1.7
22	5.9	7.6	8.4	5.2	1.9	1.1	1.1	1.3	1.5	1	0		0	1.1
23	7.9	7.9	5.9	3	2.4	2.3	2.2	2	2.2	0			1	2
24	7.3	7.3	3.3	1.3	1	1.1	1.4	1.2	1.6	1	0		0	1
25	0.8	1.8	4.6	3.8	3.6	3.7	3	2.5	3.2	0			1	0.8
26	1.7	3.3	5.4	4.8	3.8	2.9	1.7	1.6	2	1	1	0	1	1.6
27	7.4	7.4	4.3	1.9	2	1.7	1.3	1.2	1.4	1	0		0	1.2
28	6.3	8.6	6.7	5.4	3.3	4.2	2.3	3	1.9	0			1	1.9
29	6.3	8.1	7.7	7.8	4.3	1.5	1.8	1.5	1.3	1	1	1	0	1.3
30	1.8	1.8	1.9	1.7	1.6	1.8	1.9	2.2	2.3	0			1	1.6
31	1.5	3.1	4.5	1.8	1.5	1.2	1.9	1.4	1.2	1	1	1	0	1.2
32	4.3	4.3	2.5	2.3	3.3	4.2	3.8	2.4	2.3	0			1	2.3
33	1.1	2.6	2.2	1.8	2.5	2.7	2.9	2.3	1.3	1	0		0	1.1
34	2.7	6.6	8.5	6	2.5	3.2	1.8	1.2	1.5	1	0		0	1.2
35	6.9	8.2	7.3	3.6	2.3	2.1	2.5	2.5	3.3	0			1	2.1
36	4.6	7.9	6.5	6.2	5.4	5.1	3.8	2.4	2.5	0			1	2.4
37	4.9	7.1	5.8	2.6	1.4	1	1.8	1.3	2.4	1	1	1	1	1
38	4.3	5.3	3.7	3.4	3.2	2.5	2.5	2.4	2.1	0			1	2.1
39	7.6	10.3	9.3	9.2	5.9	3	2.1	2.5	1.3	1	0		0	1.3
40	6.5	7.5	6	3.6	1.5	1.3	2	0.8	3.1	1	1	1	1	0.8
41	3.8	7	7.6	6.3	5.4	4	2.6	1.8	1.8	0			1	1.8
42	7.2	7.6	7.7	5.8	4.4	3.9	7.2	9.3	6.7	0			1	3.9
43	2.4	2.4	1.6	1.3	1.3	1.7	1.7	1.7	1.3	1	0		0	1.3
44	2	2	2.6	3.7	2.7	1.7	1.7	1	1.6	1	0		0	1
45	2.3	3.6	5.1	4.4	2.5	1.5	1.6	2.1	1.4	1	1	1	0	1.4
46	6.1	7.2	11.3	11.2	4.1	1.5	2.5	3.4	2.7	1	1	0	1	1.5
